# Supplementary material for: One-step synthesis of pure-phase amino-functionalized zirconium-based capsule ZrC-1-NH2 for photocatalytic degradation of tetracycline
Source: Royal Society of Chemistry journal article supplement (doi:10.1039/d4ce00721b), 2024-01-01
Supplement: d4ce00721b1.pdf [file d4ce00721b1.pdf]

## Supporting information

### One-step synthesis of pure-phase amino-functionalized zirconium-based capsule ZrC-1-NH<sub>2</sub> for photocatalytic degradation of tetracycline

Ting-Ting Xu<sup>a</sup>, De-Sheng Wei<sup>a</sup>, Shuang-Bao Li<sup>b</sup>, Yu-Teng Zhang<sup>a,\*</sup>,  
Nan Lv<sup>a,\*</sup>

<sup>a</sup> College of Chemical Engineering, Northeast Electric Power University, Jilin City 132012, PR China

<sup>b</sup> School of Chemical and Pharmaceutical Engineering, Jilin Institute of Chemical Technology, Jilin, 132022, PR China

\*Corresponding author.

E-mail: zhangyuteng@neepu.edu.cn (Y.-T. Zhang), lvnan0607111@126.com (N. Lv)

Table. S1. Crystal data and structure refinement for ZrC-1-NH<sub>2</sub>

Fig. S1. Coordination environment diagrams of Cl1 (a) and Cl2 (b), aiming to emphasize the multiple hydrogen bonds within the structure, where Cl1 has an occupancy of 1 and Cl2 has an occupancy of 0.5.

Fig. S2. PXRD patterns of ZrC-1-NH<sub>2</sub>

Fig.S3. ESI-TOF-MS of MW-ZrC-1

Fig. S4. EDS spectrum of MW-ZrC-1-NH<sub>2</sub>

Fig. S5. Comparison of photocatalytic degradation of tetracycline by MW-ZrC-1-NH<sub>2</sub> and MW-ZrC-1.

Fig. S6 (a) The removal efficiency of TC on different pH; (b) the kinetic curves of TC on different pH.

Fig. S7. VB-XPS spectra of MW-ZrC-1-NH<sub>2</sub>.

Fig. S8. The recycle experiments of MW-ZrC-1-NH<sub>2</sub> photocatalyst.

Fig. S9. The ESI-TOF-MS of MW-ZrC-1-NH<sub>2</sub> after photodegradation of TC.

Table. S1. Crystal data and structure refinement for ZrC-1-NH<sub>2</sub>

| Identification code                       | ZrC-1-NH <sub>2</sub>                                                                          |
|-------------------------------------------|------------------------------------------------------------------------------------------------|
| Empirical formula                         | C <sub>54</sub> H <sub>48</sub> Cl <sub>2</sub> N <sub>3</sub> O <sub>21</sub> Zr <sub>6</sub> |
| Formula weight                            | 1693.17                                                                                        |
| Temperature/K                             | 150.0                                                                                          |
| Crystal system                            | Orthorhombic                                                                                   |
| Space group                               | Cmcm                                                                                           |
| a/Å                                       | 19.8615(12)                                                                                    |
| b/Å                                       | 17.7218(10)                                                                                    |
| c/Å                                       | 17.2448(12)                                                                                    |
| α/°                                       | 90                                                                                             |
| β/°                                       | 90                                                                                             |
| γ/°                                       | 90                                                                                             |
| Volume/Å <sup>3</sup>                     | 6069.9(7)                                                                                      |
| Z                                         | 4                                                                                              |
| ρ <sub>calc</sub> /g/cm <sup>3</sup>      | 1.853                                                                                          |
| μ/mm <sup>-1</sup>                        | 6.389                                                                                          |
| F(000)                                    | 3340.0                                                                                         |
| Crystal size/mm <sup>3</sup>              | 0.21 × 0.2 × 0.19                                                                              |
| Radiation                                 | GaKα (λ = 1.34139)                                                                             |
| 2θ range for data collection/°            | 5.814 to 137.288                                                                               |
| Index ranges                              | 0 ≤ h ≤ 22,<br>-24 ≤ k ≤ 24,<br>-21 ≤ l ≤ 0                                                    |
| Reflections collected                     | 6307                                                                                           |
| Independent reflections                   | 3322 [R <sub>int</sub> = 0.0438, R <sub>sigma</sub> = 0.0486]                                  |
| Data/restraints/parameters                | 3322/66/215                                                                                    |
| Goodness-of-fit on F <sup>2</sup>         | 1.046                                                                                          |
| Final R indexes [I >= 2σ (I)]             | R <sub>1</sub> = 0.0680, wR <sub>2</sub> = 0.1990                                              |
| Final R indexes [all data]                | R <sub>1</sub> = 0.0716, wR <sub>2</sub> = 0.2027                                              |
| Largest diff. Peak/hole/ eÅ <sup>-3</sup> | 1.76/-1.36                                                                                     |

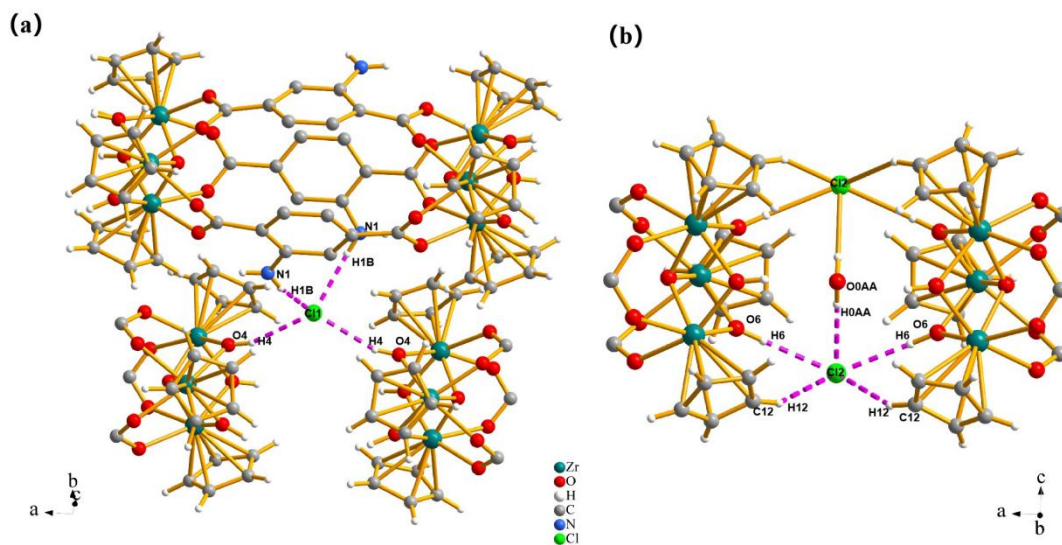

Fig. S1. Coordination environment diagrams of C11 (a) and C12 (b), aiming to emphasize the multiple hydrogen bonds within the structure, where the occupancy of C11 is 1 and that of C12 is 0.5. For clarity, the hydrogen atoms on the benzene ring of the ligand are omitted.

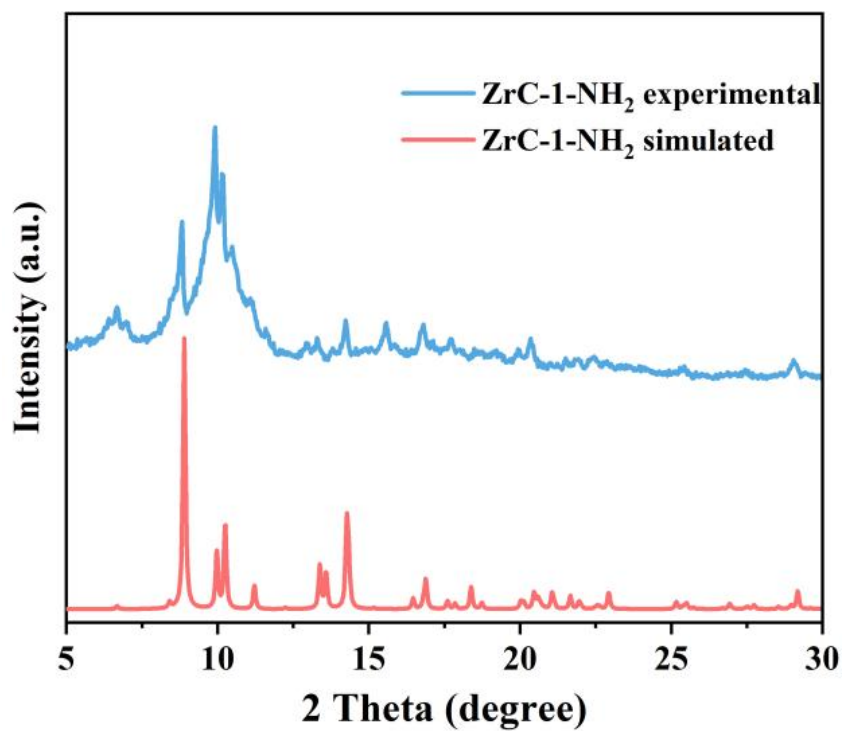

Fig. S2 PXRD patterns of ZrC-1-NH<sub>2</sub>.

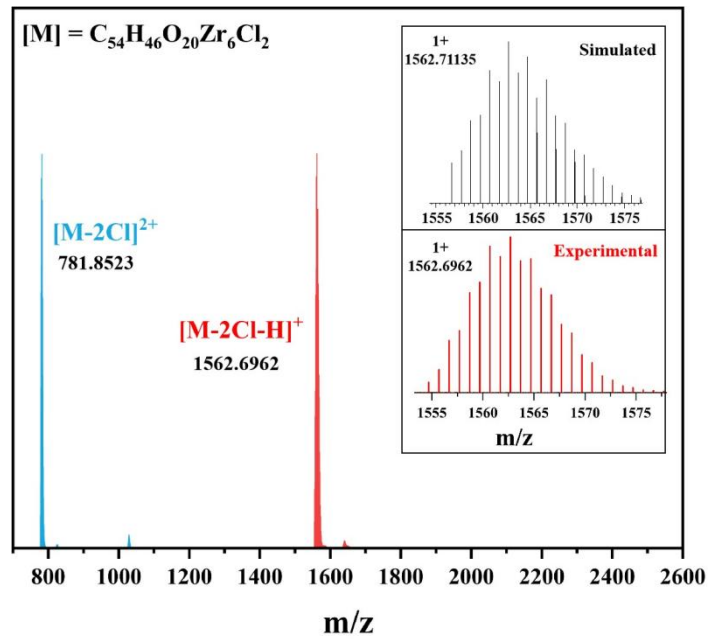

Fig.S3. ESI-TOF-MS of MW-ZrC-1

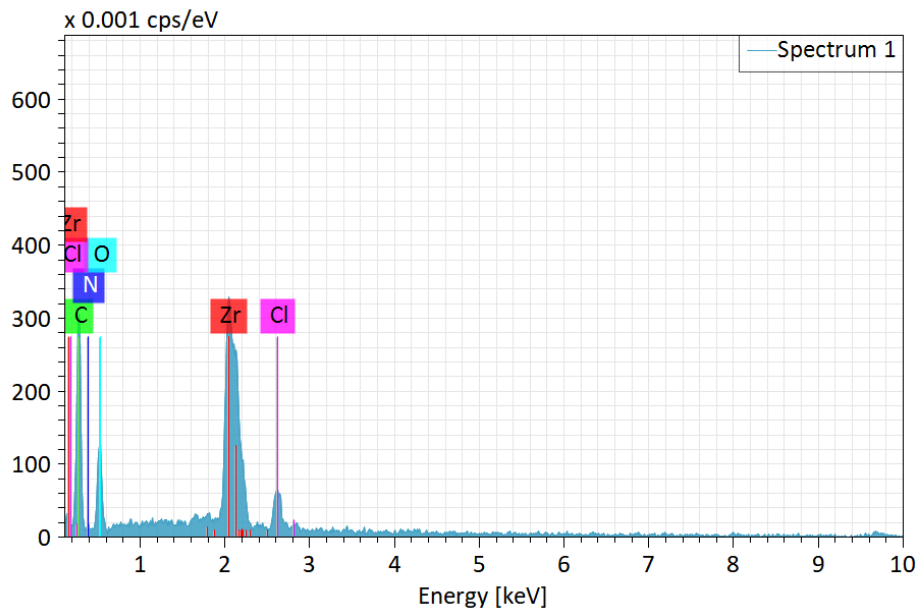

Fig. S4. EDS spectrum of MW-ZrC-1-NH<sub>2</sub>

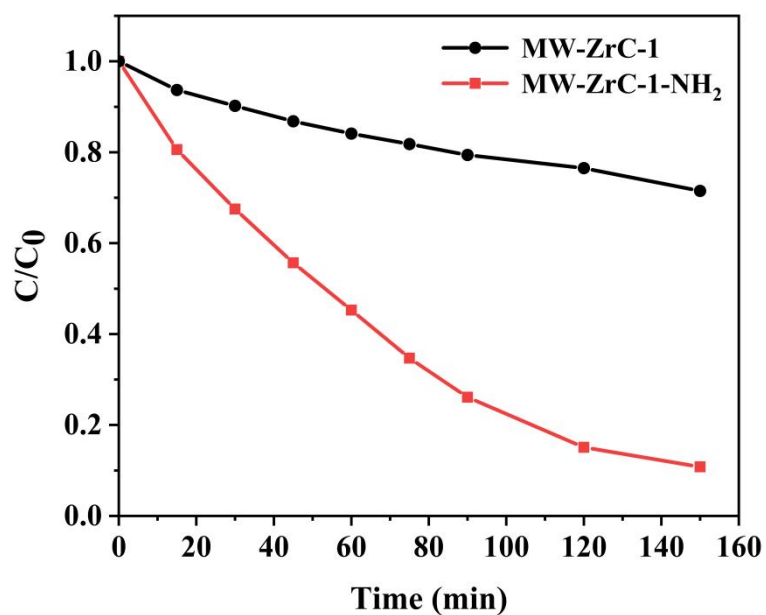

Fig. S5. Comparison of photocatalytic degradation of tetracycline by MW-ZrC-1-NH<sub>2</sub> and MW-ZrC-1.

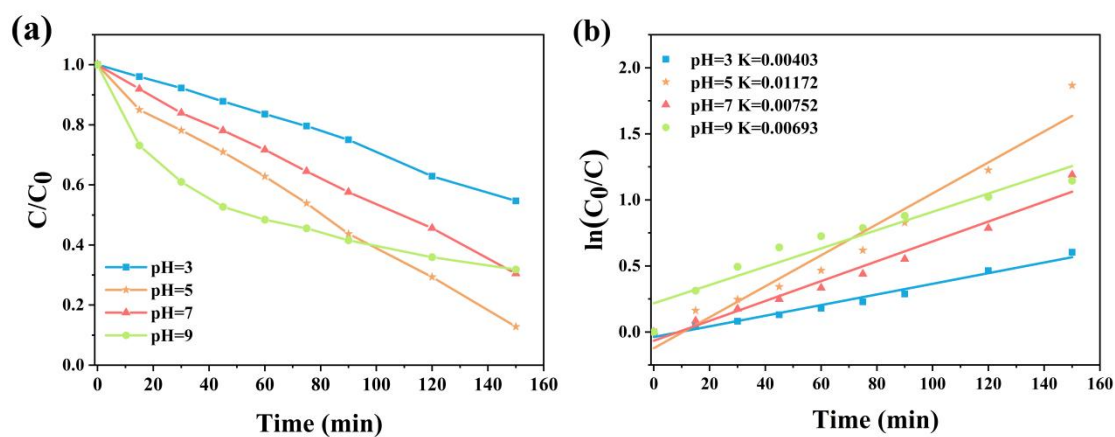

Fig. S6 (a) The removal efficiency of TC on different pH; (b) the kinetic curves of TC on different pH.

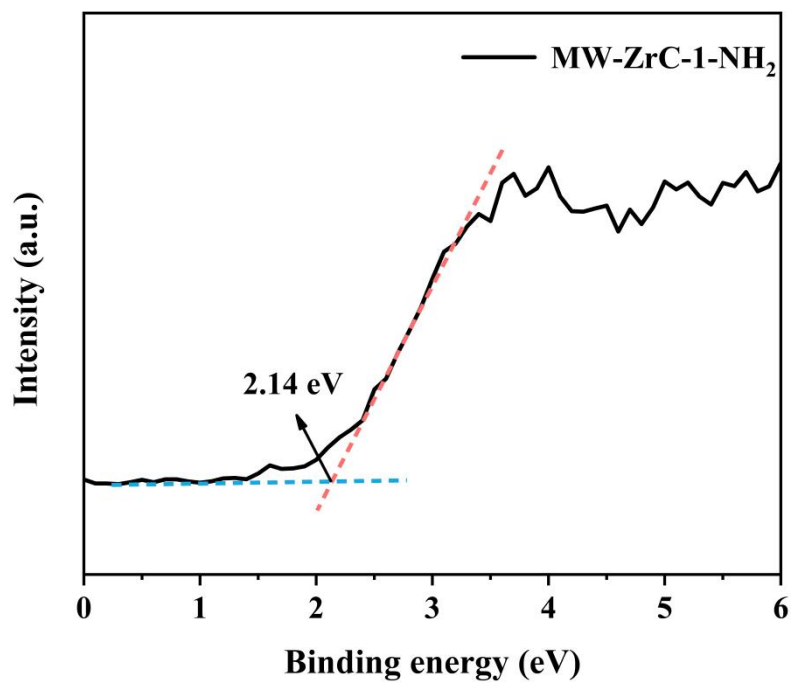

Fig. S7. VB-XPS spectra of MW-ZrC-1-NH<sub>2</sub>.

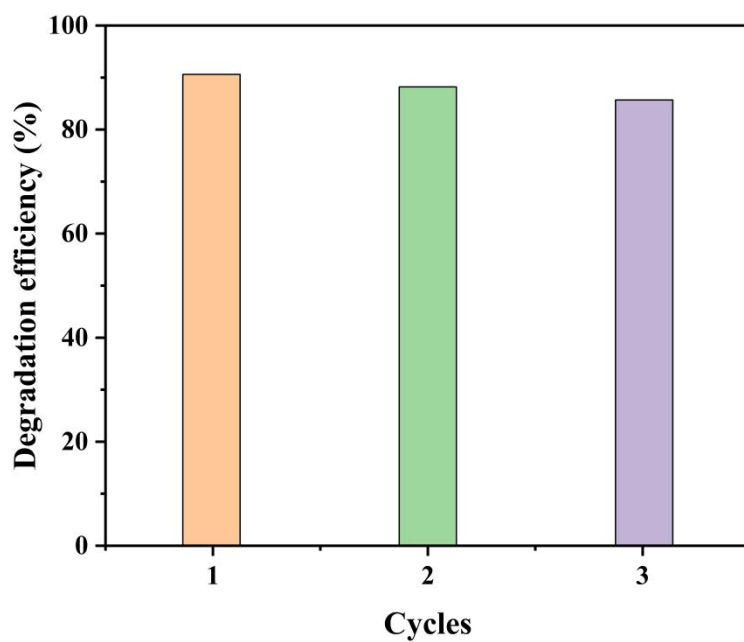

Fig. S8. The recycle experiments of MW-ZrC-1-NH<sub>2</sub> photocatalyst.

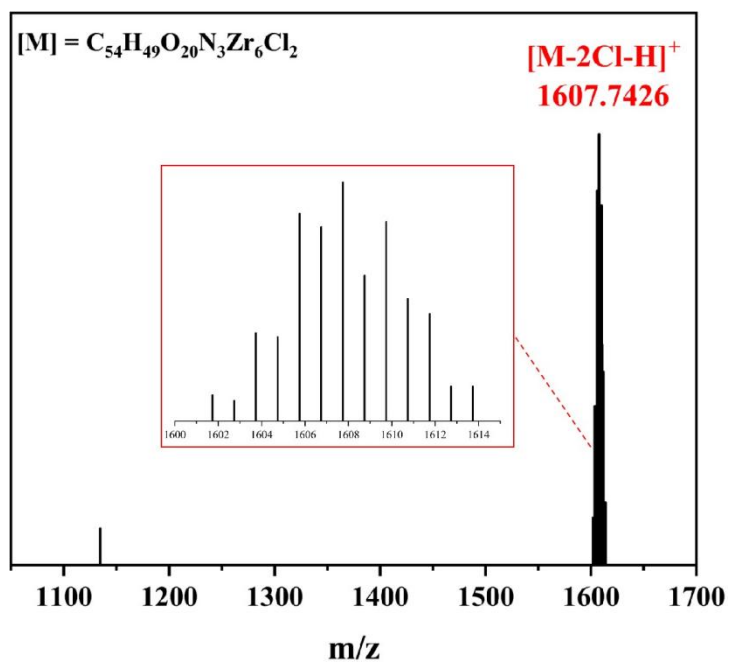

Fig. S9. The ESI-TOF-MS of MW-ZrC-1-NH<sub>2</sub> after photodegradation of TC.
